# Supplementary material for: Microencapsulation of Curcumin in Crosslinked Jelly Fig Pectin Using Vacuum Spray Drying Technique for Effective Drug Delivery
Source: MDPI journal article supplement (doi:10.3390/polym13162583), 2021-08-04
Supplement: s1 [file s1]

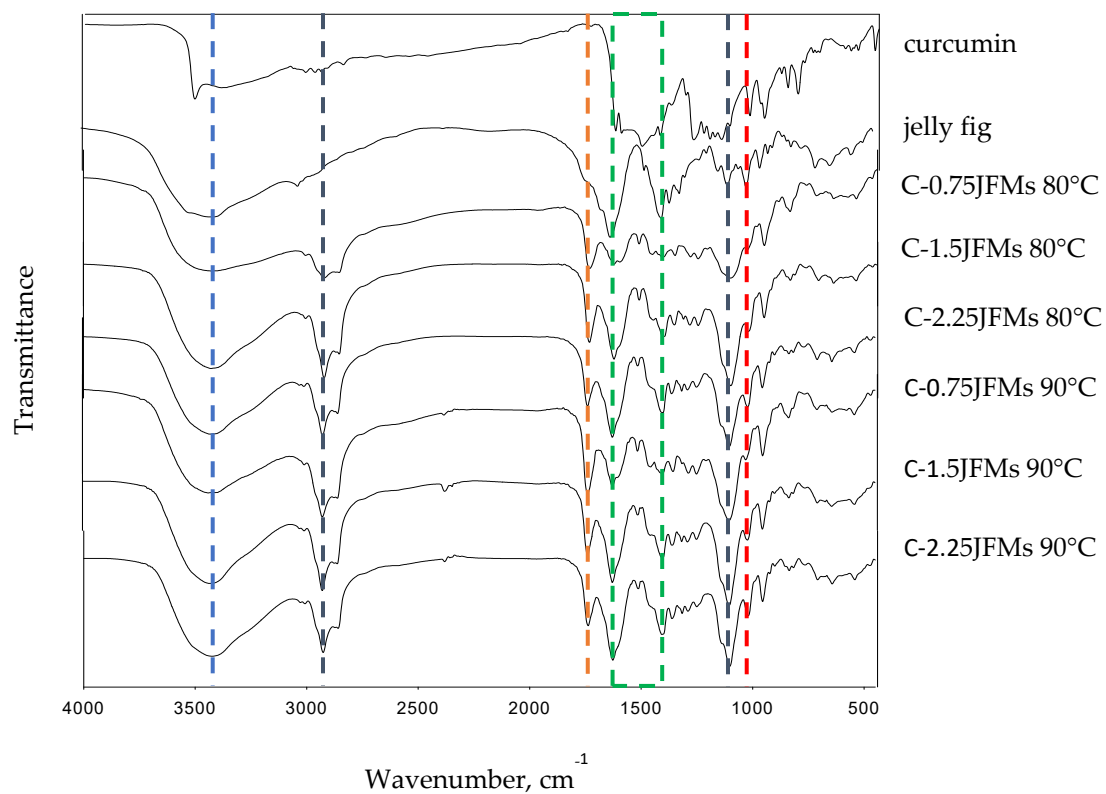

Figure S1. FTIR analysis of curcumin, jelly fig pectin and microcapsules

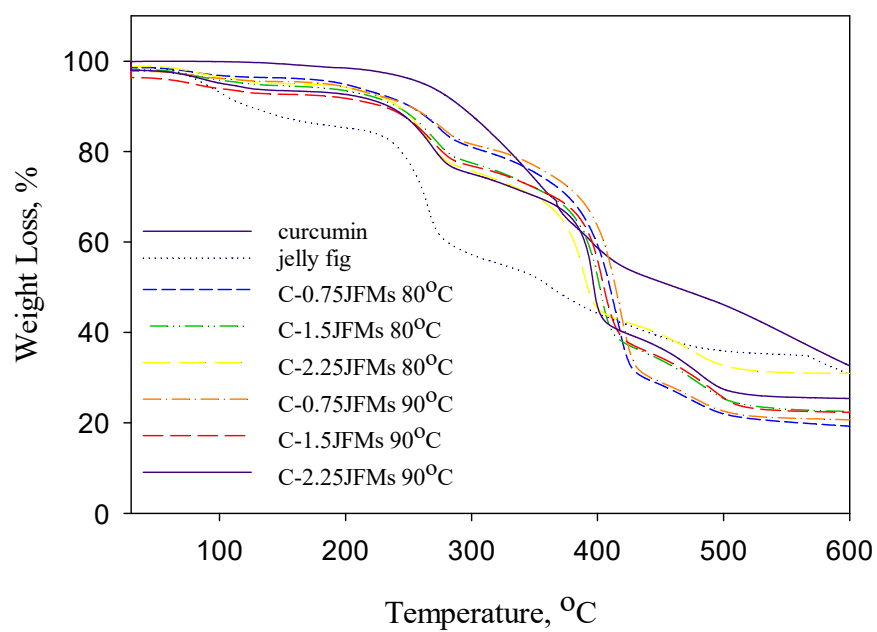

Figure S2. Thermogravimetric curves for curcumin, jelly fig and microcapsules
